# Supplementary material for: Predictive Role of Circulating Immune Cell Subtypes Early after Allogeneic Hematopoietic Stem Cell Transplantation in Patients with Acute Leukemia
Source: PubMed Central journal article supplement — Int J Stem Cells. 2018 Dec 31;12(1):73–83. doi: 10.15283/ijsc18094 (PMC6457701; doi:10.15283/ijsc18094), 2018-12-31
Supplement: IJSC-12-073_suppl.pdf [file IJSC-12-073_suppl.pdf]

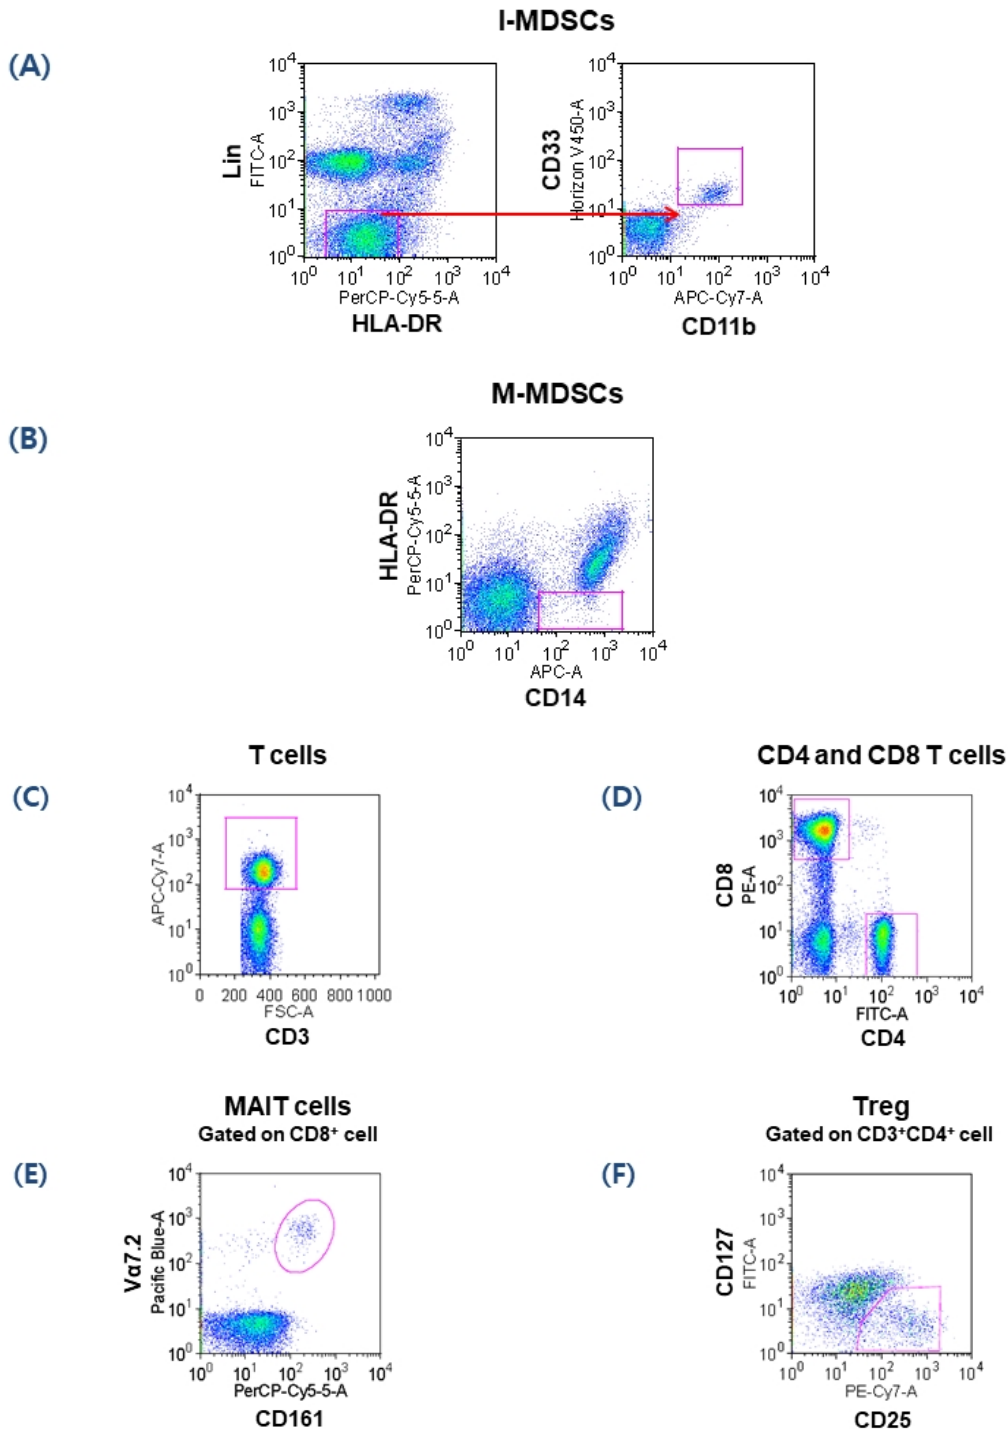

**Fig. S1.** Representative FACS analysis of various immune cell subtypes in the peripheral blood of the patients receiving allo-HSCT. (A) Immature myeloid-derived suppressor cells (I-MDSCs), (B) monocytic myeloid-derived suppressor cells (M-MDSCs), (C) CD3 T cells, (D) CD4 and CD8 T cells, (E) mucosal-associated invariant T cells (MAIT cells), (F) regulatory T cells (Treg), (G) natural killer (NK) and natural killer T (NKT)-like cells, (H) invariant NKT (iNKT) cells, (I) natural-killer receptor group 2, member D (NKG2D)-expressing NK cells, and (J) NKG2D-expressing NKT cells.

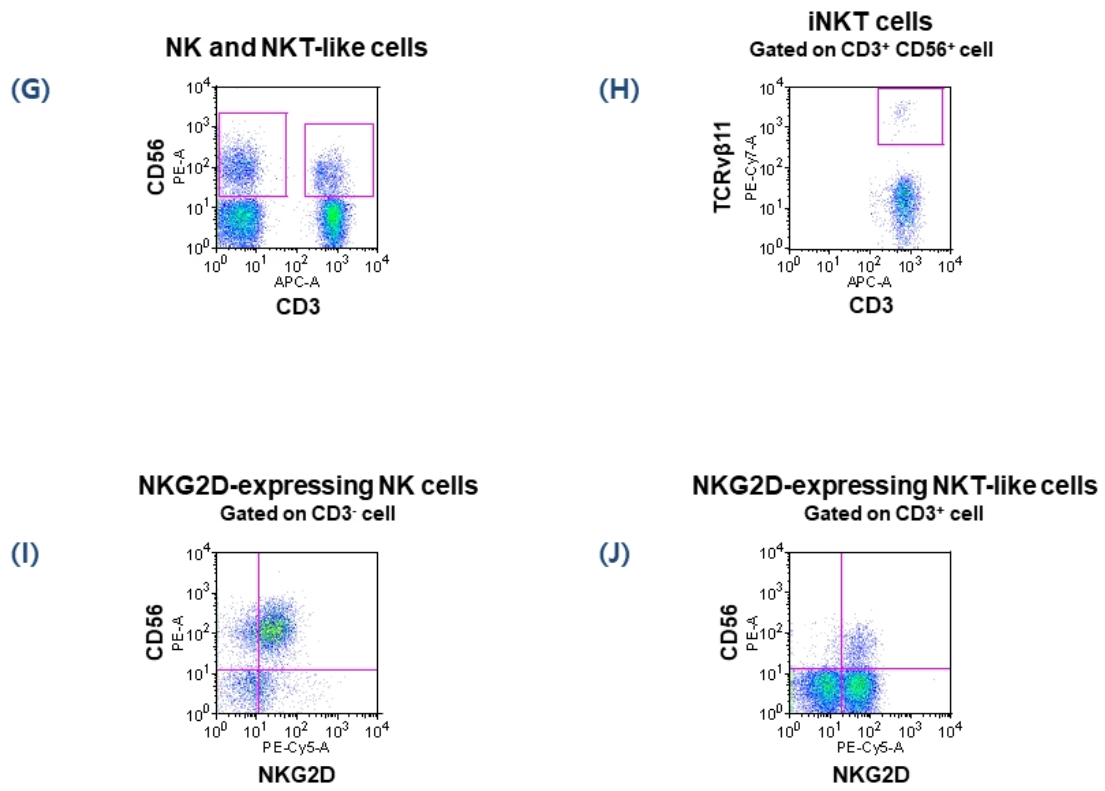

Fig. S1. Continued.

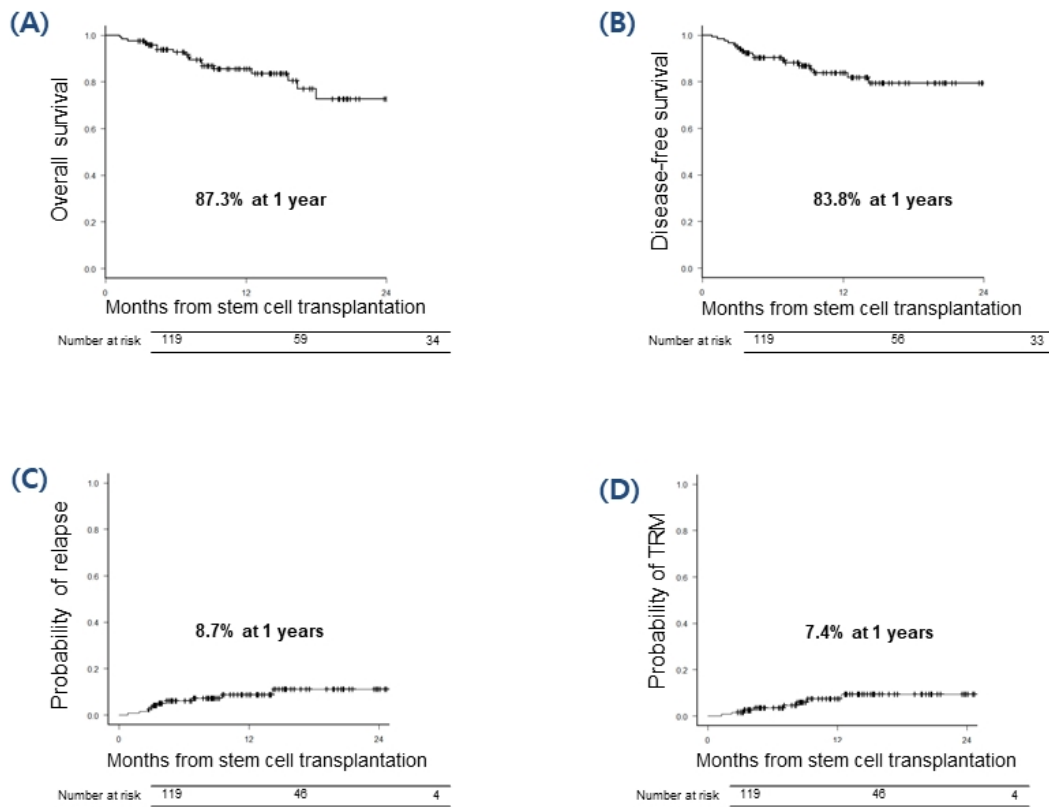

**Fig. S2.** Transplant outcomes. (A) overall survival, (B) disease-free survival, (C) cumulative incidence (CI) of relapse, (D) CI of treatment-related mortality (TRM).

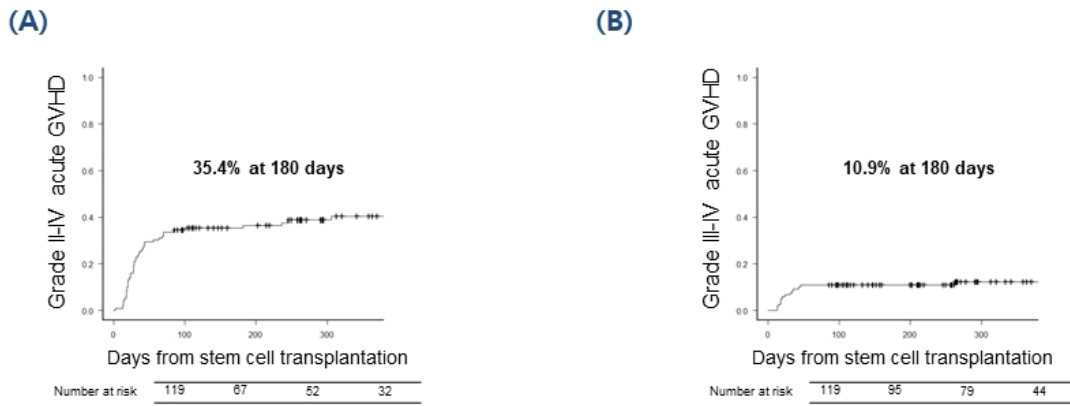

**Fig. S3.** Cumulative incidences of acute graft-versus-host disease (GVHD) of total patients. (A) Grade II-IV acute GVHD, (B) Grade III-IV acute GVHD.

**Table S1.** Univariate analyses of factors affecting GVHD outcomes

| Variables (N=119)                         | N  | Grade III-IV acute GVHD at 180 days (95%CI) | p-value |
|-------------------------------------------|----|---------------------------------------------|---------|
| <b>A. Clinical variables</b>              |    |                                             |         |
| Patient age (years)                       |    |                                             | 0.077   |
| <40                                       | 43 | 18.6% (8.6~31.5)                            |         |
| ≥40                                       | 76 | 6.6% (2.4~13.7)                             |         |
| Donor age (years)                         |    |                                             | 0.807   |
| ≤35                                       | 53 | 13.2% (5.7~23.8)                            |         |
| >35                                       | 58 | 10.3% (4.2~19.8)                            |         |
| Unavailable (double cord transplant)      | 8  |                                             |         |
| Disease                                   |    |                                             | 0.941   |
| AML                                       | 74 | 10.8% (5.0~19.1)                            |         |
| ALL                                       | 44 | 11.4% (4.1~22.7)                            |         |
| Mixed phenotype acute leukemia            | 1  | 0.0%                                        |         |
| HLA match                                 |    |                                             | 0.473   |
| Full-matched HLA                          | 86 | 15.2% (5.4~29.5)                            |         |
| Mismatched HLA                            | 33 | 9.3% (4.3~16.6)                             |         |
| Comorbidity (HCT-CI <sup>†</sup> )        |    |                                             | 0.759   |
| Low to intermediate (score <3) (N, %)     | 81 | 11.1% (5.4~19.1)                            |         |
| High (score ≥3) (N, %)                    | 38 | 10.5% (3.3~22.7)                            |         |
| Conditioning intensity                    |    |                                             | 0.464   |
| Myeloablative                             | 84 | 11.9% (6.1~19.9)                            |         |
| Reduced intensity                         | 35 | 8.6% (2.1~20.8)                             |         |
| Stem cell source                          |    |                                             | 0.780   |
| Bone marrow                               | 18 | 5.6% (0.3~23.1)                             |         |
| Peripheral blood                          | 93 | 12.9% (7.0~20.6)                            |         |
| Unavailable (double cord transplant)      | 8  |                                             |         |
| Infused dose of CD34 ( $\times 10^6$ /kg) |    |                                             | 0.971   |
| <5.7 (median)                             | 59 | 10.2% (4.1~19.5)                            |         |
| ≥5.7 (median)                             | 60 | 11.7% (5.1~21.2)                            |         |
| Infused dose of CD3 ( $\times 10^6$ /kg)  |    |                                             | 0.562   |
| <339.9 (median)                           | 59 | 11.9% (5.2~21.6)                            |         |
| ≥339.9 (median)                           | 60 | 10.0% (4.0~19.2)                            |         |
| ATG use                                   |    |                                             | 0.378   |
| 0~2.5 mg/kg                               | 88 | 9.1% (4.2~16.2)                             |         |
| 5.0~10.0 mg/kg                            | 31 | 16.1% (5.8~31.2)                            |         |
| TBI use                                   |    |                                             | 0.777   |
| Yes                                       | 96 | 10.4% (5.3~17.5)                            |         |
| No                                        | 23 | 13.0% (3.1~30.2)                            |         |
| Donor type                                |    |                                             | 0.383   |
| Sibling                                   | 48 | 6.2% (1.6~15.6)                             |         |
| Unrelated                                 | 40 | 17.5% (7.6~30.8)                            |         |
| Haploidentical                            | 23 | 13.0% (3.1~30.2)                            |         |
| Double cord blood                         | 8  | 0.0%                                        |         |
| GVHD prophylaxis                          |    |                                             | 0.978   |
| Methotrexate + cyclosporine               | 45 | 33.3% (20.0~47.2)                           |         |
| Methotrexate + tacrolimus                 | 66 | 36.4% (24.9~48.0)                           |         |
| Mycophenolate mofetil + tacrolimus        | 8  | 37.5% (7.2~69.4)                            |         |

**Table S1.** Continued

| Variables (N=119)                                                                                      | N  | Grade III-IV acute GVHD at 180 days (95%CI) | p-value |
|--------------------------------------------------------------------------------------------------------|----|---------------------------------------------|---------|
| <b>B. Experimental variables (post-transplant immune cell populations)</b>                             |    |                                             |         |
| CD3 <sup>+</sup> T cells                                                                               |    |                                             | 0.297   |
| ≤61.5                                                                                                  | 95 | 11.6 (6.1~18.9)                             |         |
| >61.5                                                                                                  | 22 | 4.5 (0.3~19.4)                              |         |
| Unknown                                                                                                | 2  |                                             |         |
| CD4 <sup>+</sup> T cells                                                                               |    |                                             | 0.368   |
| ≤1.45                                                                                                  | 30 | 16.7 (5.9~32.1)                             |         |
| >1.45                                                                                                  | 89 | 9.0 (4.2~16.1)                              |         |
| CD8 <sup>+</sup> T cells                                                                               |    |                                             | 0.044   |
| ≤5.8                                                                                                   | 26 | 23.1 (9.1~40.7)                             |         |
| >5.8                                                                                                   | 93 | 7.5 (3.3~14.1)                              |         |
| CD56 <sup>+</sup> cells                                                                                |    |                                             | 0.116   |
| ≤1.15                                                                                                  | 32 | 11.9 (5.2~21.6)                             |         |
| >1.15                                                                                                  | 85 | 8.6 (3.1~17.6)                              |         |
| Unknown                                                                                                | 2  |                                             |         |
| Natural killer cells (CD3 <sup>-</sup> CD56 <sup>+</sup> )                                             |    |                                             | 0.765   |
| ≤8.1                                                                                                   | 59 | 11.9 (5.2~21.6)                             |         |
| >8.1                                                                                                   | 58 | 8.6 (3.1~17.6)                              |         |
| Unknown                                                                                                | 2  |                                             |         |
| NKT-like cells (CD3 <sup>+</sup> CD56 <sup>+</sup> )                                                   |    |                                             | 0.806   |
| ≤2                                                                                                     | 50 | 12.0 (4.8~22.7)                             |         |
| >2                                                                                                     | 67 | 9.0 (4.2-3.6~17.3)                          |         |
| Unknown                                                                                                | 2  |                                             |         |
| Regulatory T cells (CD25 <sup>+</sup> CD127 <sup>low</sup> in CD3 <sup>+</sup> CD4 <sup>+</sup> cells) |    |                                             | 0.229   |
| ≤0.83                                                                                                  | 36 | 16.7 (6.7~30.6)                             |         |
| >0.83                                                                                                  | 40 | 7.5 (1.9~18.4)                              |         |
| Unknown                                                                                                | 43 |                                             |         |
| Invariant NKT cells (NKT-like cell marking Vβ11 <sup>+</sup> CD3 <sup>+</sup> )                        |    |                                             | 0.028   |
| ≤0.027                                                                                                 | 39 | 17.9 (7.8~31.5)                             |         |
| >0.027                                                                                                 | 78 | 6.4 (2.4~13.4)                              |         |
| Unknown                                                                                                | 2  |                                             |         |
| NKG2D expression on NK cells                                                                           |    |                                             | 0.203   |
| ≤5.6 (5.8)                                                                                             | 61 | 13.1 (6.1~22.9)                             |         |
| >5.6 (5.8)                                                                                             | 56 | 7.1 (2.3~15.9)                              |         |
| Unknown                                                                                                | 2  |                                             |         |
| NKG2D expression on NKT-like cells,                                                                    |    |                                             | 0.650   |
| ≤0.42                                                                                                  | 33 | 9.1 (2.3~21.9)                              |         |
| >0.42                                                                                                  | 84 | 10.7 (5.2~18.4)                             |         |
| Unknown                                                                                                | 2  |                                             |         |
| MAIT cells (CD8 <sup>+</sup> CD161 <sup>+</sup> Vα7.2 <sup>+</sup> )                                   |    |                                             | 0.144   |
| ≤0.17                                                                                                  | 25 | 20.0 (7.1~37.6)                             |         |
| >0.17                                                                                                  | 94 | 8.5 (4.0~15.3)                              |         |
| I-MDSC (HLA-DR <sup>-</sup> LIN <sup>-</sup> CD11b <sup>+</sup> CD33 <sup>+</sup> )                    |    |                                             | 0.087   |
| ≤0.11                                                                                                  | 60 | 6.7 (2.1~14.9)                              |         |
| >0.11                                                                                                  | 59 | 15.3 (7.5~25.6)                             |         |
| M-MDSC (HLA-DR <sup>-</sup> CD14 <sup>+</sup> )                                                        |    |                                             | 0.030   |
| ≤0.27                                                                                                  | 62 | 17.7 (9.4~28.2)                             |         |
| >0.27                                                                                                  | 57 | 3.5 (0.6~10.8)                              |         |

GVHD: graft-versus-host disease, AML: acute myeloid leukemia, ALL: acute lymphoblastic leukemia, ATG: anti-thymocyte globulin, TBI: total body irradiation, HCT-CI: hematopoietic cell transplantation-comorbidity index, NKG2D: natural killer group 2, member D, MAIT: mucosal associated invariant T cell, I-MDSCs: immature myeloid-derived suppressor cells, M-MDSCs: monocytic myeloid-derived suppressor cells.

<sup>†</sup>HCT-CI was defined by Sorror et al. (21).

**Table S2.** Univariate analyses for association clinical factors with iNKT cells and M-MDSC cells

| Variables (N=119)                           | Invariant NKT Cells<br>(Mean±SD) | p-value | M-MDSC Cells<br>(Mean±SD) | p-value |
|---------------------------------------------|----------------------------------|---------|---------------------------|---------|
| Patient age (years)                         |                                  | 0.655   |                           | 0.647   |
| <40                                         | 0.374±0.749%                     |         | 0.289±0.660%              |         |
| ≥40                                         | 0.474±1.345%                     |         | 0.243±0.417%              |         |
| Donor age (years)                           |                                  | 0.172   |                           | 0.015   |
| ≤35                                         | 0.522±1.547%                     |         | 0.398±0.735%              |         |
| >35                                         | 0.229±0.417%                     |         | 0.153±0.159%              |         |
| Unavailable (double cord transplant)        |                                  |         |                           |         |
| Disease                                     |                                  | 0.560   |                           | 0.216   |
| AML                                         | 0.389±1.307%                     |         | 0.577±0.811%              |         |
| ALL or Mixed phenotype acute leukemia       | 0.519±0.856%                     |         | 0.907±2.039%              |         |
| HLA match                                   |                                  | 0.268   |                           | 0.002   |
| Full-matched HLA                            | 0.657±1.736%                     |         | 1.354±2.385%              |         |
| Mismatched HLA                              | 0.354±0.847%                     |         | 0.452±0.619%              |         |
| Comorbidity (HCT-CI <sup>†</sup> )          |                                  | 0.143   |                           | 0.044   |
| Low to intermediate (score <3) (N, %)       | 0.328±0.737%                     |         | 0.524±0.748%              |         |
| High (score ≥3) (N, %)                      | 0.664±1.730%                     |         | 1.080±2.213%              |         |
| Conditioning intensity                      |                                  | 0.363   |                           | 0.556   |
| Myeloablative                               | 0.373±0.754%                     |         | 0.653±1.559%              |         |
| Reduced intensity                           | 0.586±1.788%                     |         | 0.820±0.962%              |         |
| Stem cell source                            |                                  | 0.924   |                           | 0.742   |
| Bone marrow                                 | 0.346±0.412%                     |         | 0.765±0.925%              |         |
| Peripheral blood                            | 0.373±1.207%                     |         | 0.642±1.521%              |         |
| Unavailable (double cord transplant)        |                                  |         |                           |         |
| Infused dose of CD34 (×10 <sup>6</sup> /kg) |                                  | 0.455   |                           | 0.500   |
| <5.7 (median)                               | 0.517±1.008%                     |         | 0.719±0.873%              |         |
| ≥5.7 (median)                               | 0.356±1.299%                     |         | 0.685±1.793%              |         |
| Infused dose of CD3 (×10 <sup>6</sup> /kg)  |                                  | 0.777   |                           | 0.894   |
| <339.9 (median)                             | 0.468±1.005%                     |         | 0.614±0.738%              |         |
| ≥339.9 (median)                             | 0.407±1.297%                     |         | 0.789±1.848%              |         |
| ATG use                                     |                                  | 0.660   |                           | 0.801   |
| 0~2.5 mg/kg                                 | 0.409±0.857%                     |         | 0.682±1.531%              |         |
| 5.0~10.0 mg/kg                              | 0.518±1.785%                     |         | 0.760±0.999%              |         |
| TBI use                                     |                                  | 0.989   |                           | 0.175   |
| Yes                                         | 0.436±1.262%                     |         | 0.343±0.360%              |         |
| No                                          | 0.440±0.590%                     |         | 0.788±1.547%              |         |
| Donor type                                  |                                  | <0.001  |                           | 0.002   |
| Sibling                                     | 0.315±0.453%                     |         | 0.458±0.640%              |         |
| Unrelated                                   | 0.393±1.170%                     |         | 0.758±2.132%              |         |
| Haploidentical                              | 0.439±1.828%                     |         | 0.921±1.110%              |         |
| Double cord blood                           | 1.367±1.432%                     |         | 1.254±0.738%              |         |
| GVHD prophylaxis                            |                                  | <0.001  |                           | 0.006   |
| Methotrexate+cyclosporine                   | 0.299±0.457%                     |         | 0.451±0.655%              |         |
| Methotrexate+tacrolimus                     | 0.418±1.406%                     |         | 0.806±1.777%              |         |
| Mycophenolate mofetil+tacrolimus            | 1.367±1.432%                     |         | 1.254±0.738%              |         |

GVHD: graft-versus-host disease, AML: acute myeloid leukemia, ALL: acute lymphoblastic leukemia, ATG: anti-thymocyte globulin, TBI: total body irradiation, HCT-CI: hematopoietic cell transplantation-comorbidity index, M-MDSCs: monocytic myeloid-derived suppressor cells.

<sup>†</sup>HCT-CI was defined by Sorror et al. (21).
